# 1 Evolutionary ecology of natural comammox *Nitrospira* populations

2  
3 Alejandro Palomo<sup>1</sup>, Arnaud Dechesne<sup>1</sup>, Otto X. Cordero<sup>2</sup> and Barth F. Smets<sup>1</sup>

4 <sup>1</sup>Department of Environmental Engineering, Technical University of Denmark, Kgs. Lyngby, Denmark

5 <sup>2</sup>Ralph M. Parsons Laboratory for Environmental Science and Engineering, Department of Civil and Environmental  
6 Engineering, Massachusetts Institute of Technology, Cambridge, MA, USA

## 7 8 9 **ABSTRACT**

10  
11 Microbial life on Earth commonly occurs in diverse and complex communities where species interact,  
12 and their genomic repertoires evolve over time. Our understanding of species interaction and  
13 evolution has increased during last decades, but most studies of evolutionary dynamics are based on  
14 single species in isolation or experimental systems composed of few interacting species. Here, we  
15 use the microbial ecosystem found in groundwater-fed sand filters as a model to avoid this limitation.  
16 In these systems, diverse microbial communities experience relatively stable conditions, and the  
17 coupling between chemical and biological processes is generally well defined. Metagenomic analysis  
18 of 12 sand filters revealed systematic co-occurrence of at least five comammox *Nitrospira* species,  
19 favoured by low ammonium concentrations. *Nitrospira* species showed intra-population sequence  
20 diversity, although possible clonal expansion was detected in few abundant local comammox  
21 populations. *Nitrospira* populations were separated by gene flow boundaries, suggesting natural and  
22 cohesive populations. They showed low homologous recombination and strong purifying selection,  
23 the latest process being especially strong in genes essential in energy metabolism. Positive selection  
24 was detected on genes related to resistance to foreign DNA and phages. Additionally, we analysed  
25 evolutionary processes in populations from different habitats. Interestingly, our results suggest that  
26 in comammox *Nitrospira* these processes are not an intrinsic feature but greatly vary depending on  
27 the habitat they inhabit. Compared to other habitats, groundwater fed sand filters impose strong  
28 purifying selection and low recombination. Together, this study improves understanding of  
29 interactions and evolution of species in the wild, and sheds light on the environmental dependency of  
30 evolutionary processes.

31  
32  
33  
34  
35  
36  
37  
38  
39  
40  
41

42 Microorganisms dominate the tree of life based on species number and diversity, and they  
43 play an essential role in Earth's global biogeochemical cycles. Microbial species interact with each  
44 other and with the environment (ecological processes), and also undergo changes in their genomic  
45 repertoire over time (evolutionary processes). Yet, the interaction between ecological and  
46 evolutionary processes is largely unknown, especially for complex open communities. For many  
47 years, most studies of microbial communities in open, complex environments have focused on  
48 ecological aspects as it was believed that evolutionary changes happen at much larger timescale<sup>1</sup>.  
49 However, in recent years, with the growth of population-genomics analysis, researchers have started  
50 to investigate both ecological and evolutionary processes in microbial communities. Yet, most studies  
51 of evolutionary dynamics are based on single species in isolation<sup>2</sup> or experimental systems composed  
52 of only a few interacting species<sup>3</sup>. Although these analyses have helped to better understand some  
53 aspects of evolutionary processes patterns, they have limitations because they lack many  
54 characteristics of actual natural populations (spatial structure, existence of microdiversity, predation,  
55 immigration, etc.). On the other hand, observing populations in the wild also has limitations because  
56 the conditions vary with little control (hence uncontrolled variation in population size, selection  
57 regime) and the typically unknown ecophysiology of retrieved genomes makes it difficult to interpret  
58 the observed patterns. Therefore, studying well-defined model microbial ecosystems can help to  
59 understand ecological and evolutionary processes in microbial communities<sup>4</sup>.

60 Rapid sand filters (RSF), widely used to produce drinking water from surface- or  
61 groundwater, can be a useful model system as they are characterized by stable conditions and active  
62 growth primarily driven by the oxidation of ammonia, methane, and other inorganic compounds  
63 present at low concentration in the influent water, large populations ( $\sim 10^9$  cells/g), significant mixing,  
64 continuous but limited immigration from prokaryotes in the influent water, no dispersal between  
65 separate sand filters (resulting in allopatric populations), and relatively well defined coupling between  
66 chemical and biological processes<sup>5-7</sup>. In addition, microbial communities inhabiting these systems  
67 have been described and show the dominance of complete ammonia oxidizers (comammox)<sup>8,9</sup>, which  
68 are expected to have a relatively simple basic ecology (due to their chemolithoautotrophic  
69 metabolism)<sup>10</sup>, yet are poorly studied in terms of what drives their diversity, distribution and  
70 evolution. Furthermore, as comammox bacteria occur in RSF as coexisting populations<sup>9,11</sup>, RSF offer  
71 an appropriate opportunity for resolving fine-scale genomic heterogeneity within closely related  
72 strains, and investigate if they show similar patterns in evolutionary processes (selection,  
73 recombination, etc.).

74 With the RSF microbial ecosystem model, different eco-evolutionary questions can be  
75 addressed. Of particular interest is to what extent the evolutionary processes that drive the  
76 diversification of *Nitrospira* species in RSF are dependent on their environment, as opposed to  
77 intrinsic properties of the species. Environmental dependency of microbial evolution has been  
78 investigated from different perspectives. Several studies have focused on genome signatures  
79 variations (GC, tetranucleotide signatures, codon usage, purine-pyrimidine ratio) associated with  
80 different environments (reviewed in Dutta and Paul (2012)<sup>12</sup>). Others, have studied bacterial  
81 adaptation to shifting environments<sup>13</sup>, or have targeted a specific evolutionary process across several  
82 lifestyles (homologous recombination<sup>14</sup>, selection<sup>15</sup>, etc.). Most of these studies, however, considered  
83 different species living in different environments, or closely related species with a different lifestyle

84 (i.e. free-living organisms vs pathogens). Yet, little is known about ongoing evolutionary processes  
85 of species belonging to the same lineage inhabiting different open environments. In this study, taking  
86 advantage of the multiple *Nitrospira* species present in several groundwater-fed RSF, we thoroughly  
87 investigated evolutionary processes on this local environment, and compared these observations with  
88 those in *Nitrospira* species inhabiting other open environments.

89

90

91 **Results and Discussion**

92  
 93 In this study, we examined ecological and evolutionary patterns within comammox  
 94 dominated-bacterial communities inhabiting groundwater-fed rapid sand filters. To that end, we  
 95 retrieved *Nitrospira* metagenome-assembled genomes (MAGs) from 12 similarly operated  
 96 waterworks in Denmark using a combination of automatic and manual binning (Supplementary Table  
 97 1). These MAGs spanned 16 putative species (further on simply referred to as ‘species’) using a  
 98 threshold average nucleotide identity (ANI) of  $\geq 95\%$ <sup>16–18</sup>. The phylogenomic analysis placed one  
 99 *Nitrospira* species into lineage I, 14 into lineage II, and one into other lineages (Fig. 1). Of the 16  
 100 *Nitrospira* species, 12 were classified as comammox *Nitrospira* (5 clade A and 7 clade B) (Fig. 1).  
 101

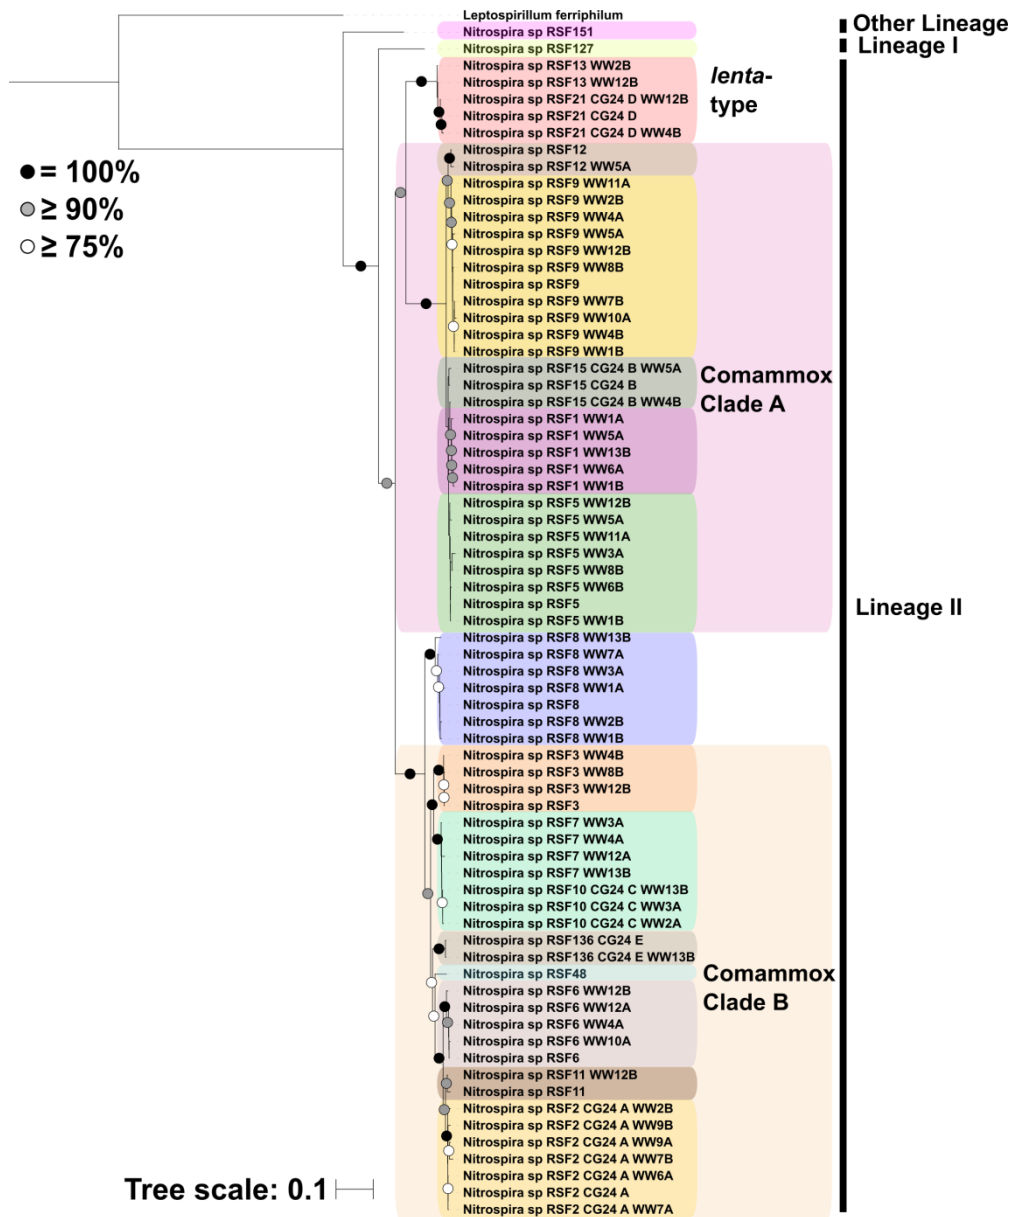

102  
 103  
 104

105 **Fig. 1. Phylogenomic affiliation of *Nitrospira* MAGs retrieved from 12 waterworks.**

106 A phylogenetic tree was built based on the concatenation of 120 proteins. MAGs affiliated to same *Nitrospira*  
107 species (MAGS with ANI  $\geq$  95% are considered members of the same species) are shown with same colours.  
108 *Leptospirillum* was used to root the tree. The strength of support for internal nodes as assessed by bootstrap  
109 replicates is indicated as coloured circles (top left legend).

110  
111 *Nitrospira* species comprised a large proportion of the microbial communities of the  
112 waterworks (27 - 70%), and comammox represented a large fraction of *Nitrospira* spp. (76 - 98%)  
113 (Fig. 2 and Supplementary Table 2). Multiple *Nitrospira* species (at least 5, 10 on average) co-  
114 occurred in all the waterworks (Fig. 2). In some cases, a single species constituted the majority of the  
115 community (WW4 and WW5), while, in other, two (WW9 and WW12) or more species dominated  
116 (Fig. 2). Distinct species were dominant in the different waterworks (Fig. 2). Generally, there was no  
117 significant correlation among the abundances of the comammox species, with the exception of few  
118 strong positive correlations (RSF5 and RSF15\_CG24\_B ( $\rho=0.84$ ), RSF6 and RSF11 ( $\rho=0.84$ )), and  
119 a negative correlation between two species (RSF3 and RSF7 ( $\rho=-0.47$ )) (Supplementary Fig. 1).  
120 Thus, co-exclusion between comammox *Nitrospira* species seems to be rare in the studied  
121 waterworks. One reason to explain this phenomenon could be the existence of large amount of unique  
122 genes in each comammox *Nitrospira* species, which has been previously reported<sup>11</sup>. As in other  
123 coexisting microorganisms, these unique genes (although the function of most of them is still  
124 unknown) might promote differences in chemotactic strategies, attachment to particles strategies,  
125 secondary metabolism, defence against predation, etc. (Reviewed in Stilianos *et al.*, (2018)<sup>19</sup>).  
126 Furthermore, the sand grains of the investigated waterworks are very porous with bacterial cells  
127 embedded in different parts of the grain<sup>20</sup>, which could enable fine-scale spatial separation among the  
128 comammox species. Nevertheless, more research is needed to properly characterise the reason  
129 enabling the observed co-occurrence of comammox *Nitrospira* species.

130 Although correlations between *Nitrospira* species were rare, positive correlations between the  
131 abundance of *Nitrospira* spp. and that of other microbes inhabiting the waterworks were more  
132 frequent (Supplementary Fig. 1). In particular, the abundance of most of the ammonia oxidizing  
133 bacterial (AOB) species positively correlated with canonical *Nitrospira* species, and interestingly,  
134 with one comammox *Nitrospira* species (RSF3) (Supplementary Fig. 1). We also observed that  
135 distinct *Nitrospira* species positively correlated with different phages retrieved from the waterworks,  
136 suggesting a specificity between phages and hosts (Supplementary Fig. 2).

137 The chemical characteristics of the water explained 31% of the variance in *Nitrospira*  
138 composition (permutation test:  $p < 0.001$ ; Supplementary Fig. 3), suggesting that water chemistry is  
139 a strong filter for the assembly of these nitrifying communities. Among the measured water  
140 constituents, the influent ammonium concentration was the variable that best explained the *Nitrospira*  
141 distribution (explained 18%; permutation test:  $p = 0.002$ ). Higher comammox species richness was  
142 detected in waterworks treating lower ammonium concentration (Supplementary Fig. 4,  $R^2 = 0.54$ ,  $p$   
143  $< 0.01$ ). In contrast, most of canonical *Nitrospira* and canonical ammonia oxidizers were related with  
144 waterworks containing higher ammonium concentration in their influent (Supplementary Fig. 3).  
145 These observations are in line with a previous study which predicted that higher ammonium  
146 concentration favours emergence of division of labour (canonical ammonia and nitrite oxidiser)<sup>21</sup>.

147 Nevertheless, we observed that a few comammox species seems to also cope with slightly higher  
148 ammonium concentrations (Supplementary Fig. 3). Moreover, as previously reported<sup>22</sup>, no clear  
149 distinction in comammox species distribution was observed based on their clade affiliation (which  
150 depends on the phylogeny of ammonia monooxygenase subunit A) (Supplementary Fig. 3). Different  
151 from the water chemistry composition, the distribution patterns of *Nitrospira* species across the  
152 waterworks were not related to their geographic distance (Mantel test:  $r$  statistics = 0.08 and  
153 significance > 0.05 vs.  $r$  statistics = 0.36 and significance < 0.001 for water chemistry).  
154  
155

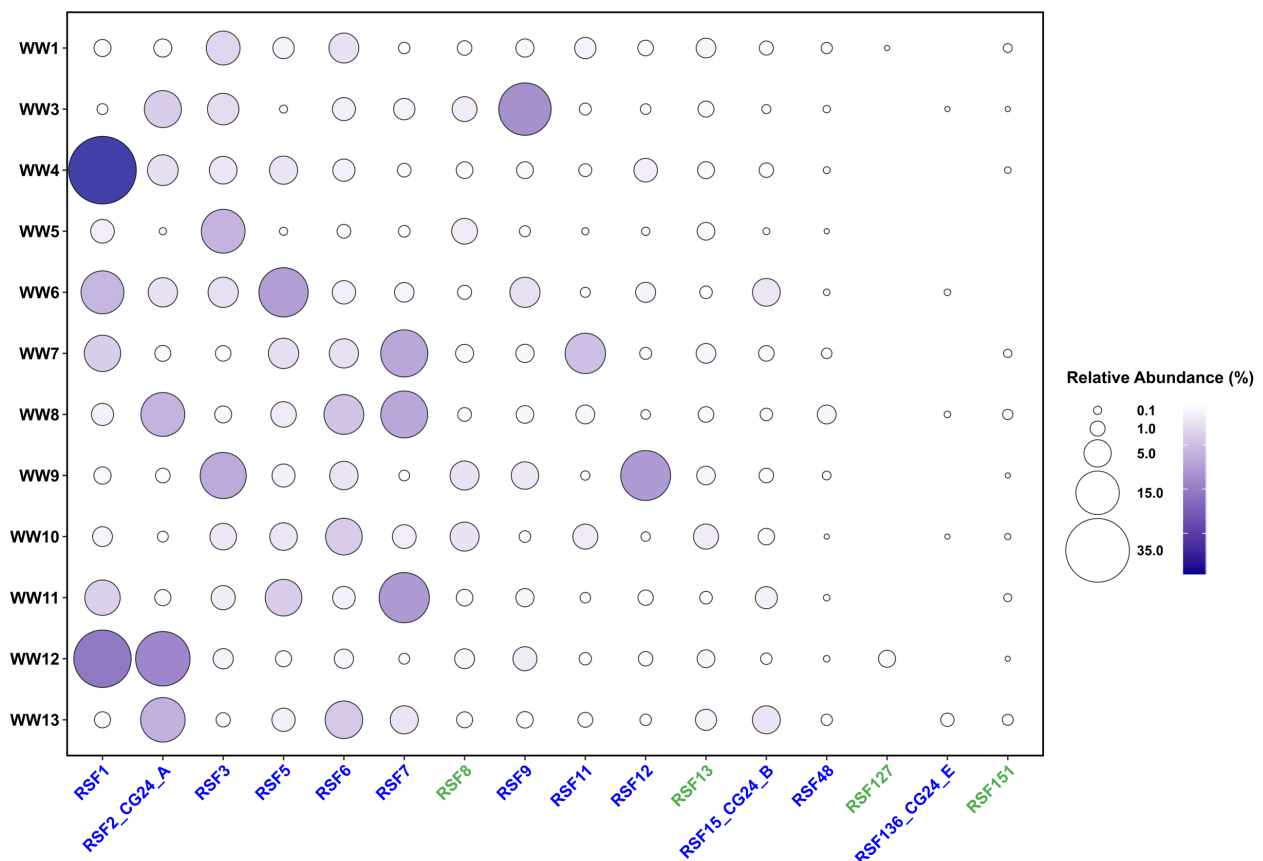

156 **Fig. 2. Abundance of *Nitrospira* species across 12 waterworks.**  
157 Relative abundance of 16 *Nitrospira* species in 12 waterworks. Comammox and canonical *Nitrospira* species  
158 are denoted in blue and green, respectively.  
159

160  
161  
162  
163  
164  
165  
166  
167

## 168 **Microdiversity within *Nitrospira* species**

169

170 Strain-level analysis across the waterworks revealed that the *Nitrospira* populations  
171 contained intra-population sequence diversity. We exploited the shotgun metagenomic data from the  
172 different waterworks to perform strain-level analyses using single nucleotide polymorphisms (SNPs).  
173 The number of SNPs/Mbp in the populations across the waterworks ranged from 14,437 to 45,664  
174 (Supplementary Table 3). Looking into the populations at local scale (species within waterworks),  
175 the number of SNPs/Mbp ranged from 249 to 37,663 (Supplementary Table 4). We observed a wide  
176 range of microdiversity (measured as nucleotide diversity ( $\pi$ )) among populations  
177 (Fig. 3A): canonical *Nitrospira* RSF8 was the most diverse species, with three times more nucleotide  
178 diversity than the less diverse *Nitrospira* species of our study (RSF1 and RSF12) (Fig. 3A). Both a  
179 homogeneous degree of microdiversity across the waterworks (e.g., RSF5 and RSF8), as well as a  
180 high microdiversity variation depending on the waterworks (e.g., RSF1, RSF9 and RSF11) was  
181 detected among the *Nitrospira* populations (Supplementary Fig. 5). Based on the observations done  
182 at species level, we hypothesised that microdiversity would be higher at low ammonium  
183 concentrations, where we observed higher comammox species diversity. However, this was not the  
184 case, as for each species, the correlations of microdiversity with ammonium concentration or  
185 comammox species richness were not significant ( $p > 0.05$ ).

186 In contrast to the observation across all the waterworks (i.e.: all species showed significant  
187 microdiversity across waterworks), we did detect a few highly abundant comammox populations with  
188 almost no microdiversity at local scale (e.g., comammox *Nitrospira* RSF1 in WW4, and comammox  
189 *Nitrospira* RSF12 in WW9) (Supplementary Fig. 6), which suggests local clonal expansions of these  
190 comammox populations in specific waterworks. In the same line, the analysis of major allele  
191 frequencies of common SNPs (for each species, SNPs present in all the strains present in each  
192 waterworks) revealed that only a fraction of the subspecies diversity is found locally (for a specific  
193 species, we detected different subspecies among waterworks, some of them being genetically  
194 homogenous. E.g.: comammox RSF3 (WW10B vs WW5) (Supplementary Fig. 7)). These results  
195 contrast with what we observed at species level, where all the diversity was represented in each  
196 waterworks (as they all contain most of the *Nitrospira* spp.; Fig. 2).

197 Similar to what we observed at species level, there was no significant correlation between  
198 similarity in subspecies composition and the geographic distance of the waterworks, with exception  
199 of *Nitrospira* sp. RSF2 ( $p < 0.01$ ) and *Nitrospira* sp. RSF8 ( $p < 0.05$ ) (Supplementary Fig. 8).  
200 However, we observed a geographic organisation of the genetic structure at most loci across the  
201 studied genomes, indicating that the *Nitrospira* populations were more similar within than between  
202 waterworks. We calculated pairwise fixation indexes  $F_{ST}$  (which measures differences in allele  
203 frequencies between populations of the same species found in two distinct waterworks) for each gene  
204 between allele frequencies from the twelve waterworks. The mean gene  $F_{ST}$  values were  $\geq 15\%$  for  
205 all *Nitrospira* populations (Supplementary Fig. 9), the most extreme case being the RSF5 population  
206 ( $F_{ST} > 40\%$ ) (Supplementary Fig. 9). In few populations (RSF2, RSF7 and RSF8), a higher dispersal  
207 ( $F_{ST} < 20\%$ ) of most alleles between waterworks was observed (Supplementary Fig. 9). These  
208 observations differ from observations from soil bacterial populations across a meadow, where most

209 of the populations had mean gene  $F_{ST}$  values  $< 5\%$ <sup>23</sup>. These contrasting results support the notion that  
210 populations in the waterworks are much more allopatric than the ones from the mentioned meadow.

211 We also investigated local regions of the *Nitrospira* genomes with significantly higher  
212  $F_{ST}$  values, as this is characteristic of local population-specific (here in each waterworks) selective  
213 pressures acting on specific loci<sup>23</sup>. Few loci were found with unusually high  $F_{ST}$  in some of the  
214 *Nitrospira* populations (Supplementary Fig. 10 and Supplementary Table 5), one of them being  
215 related with genes involved in nitrogen assimilation (*Nitrospira* sp. RSF2) (Supplementary Table 5).  
216 However, only two of these loci with unusually high site-specific differentiation of alleles (high  $F_{ST}$ )  
217 also had fewer recombinant events, and lower nucleotide diversity (Supplementary Table 5), which  
218 can be considered as a signal of recent selective sweep<sup>23</sup>. These results suggest that contrary to what  
219 it has been observed in several natural populations<sup>23-26</sup>, gene-specific sweeps seems to play a minor  
220 role in the evolution of *Nitrospira* spp. inhabiting the waterworks. A possible explanation could be  
221 the low recombination rate that characterised the waterworks *Nitrospira* populations (Fig. 3B,  
222 discussed below), as opposed to genome-wide sweeps that are associated to low recombination  
223 rates<sup>27</sup>, gene-specific sweeps are expected to occur with high recombination rates<sup>27</sup>.

224 Overall, across the 12 waterworks, all species present significant genomic microdiversity but  
225 this diversity was not always represented locally, with a few occurrences of patterns consistent with  
226 clonal expansion. The reason for the difference of within-species diversity across waterworks is  
227 unknown but the allopatric nature of the communities likely contributes to their persistence.

228

229

## 230 **Evolutionary processes at whole-genome level**

231

232 The *Nitrospira* populations were characterised by a low degree of homologous recombination.  
233 We investigated homologous recombination in the *Nitrospira* populations based on linkage  
234 disequilibrium ( $D'$  is only  $< 1$  if all possible combinations of a pair of biallelic sites are observed<sup>28</sup>.  
235 Lower  $D'$  values indicates higher levels of homologous recombination; Fig. 3B) and linkage decay  
236 (Supplementary Fig. 11). Similar results were observed for other abundant populations inhabiting the  
237 waterworks (Fig. 3B). In general, recombination was lower in the waterworks populations than in  
238 populations inhabiting a grassland meadow<sup>23</sup>, where a similar study was conducted (Fig. 3B). To  
239 further examine the relative effect of homologous recombination on the genetic diversification of  
240 populations, we measured the rates at which nucleotides become substituted as a result of  
241 recombination versus mutation using the  $r/m$  ratio. Most of the *Nitrospira* populations had a relatively  
242 low  $r/m$  ( $r/m < 2$ ) compared to recombinogenic species reported in literature ( $r/m > 4$ )<sup>29</sup>  
243 (Supplementary Fig. 12), although in one case (RSF15\_CG24\_B) the rate was similar to the value  
244 reported for a *S. flavogriseus* population ( $r/m = 28$ ) considered to be approaching panmixia<sup>30</sup>. Overall,  
245 these results suggest a low effect of recombination in the *Nitrospira* population inhabiting the studied  
246 waterworks. Increasing recombination rate has been associated with fluctuating environments as a  
247 source of variation which can accelerate adaptation favouring survival in this type of  
248 environments<sup>31,32</sup>. On the other hand, constant environments - as the waterworks studied here - tend  
249 to reduce recombination rates of inhabiting microbes<sup>31</sup>.



250 A phylogenetic analysis to assess the impact of recombination across the different *Nitrospira*  
251 species showed that these ones were separated by gene flow boundaries, consistent with the notion  
252 that these species represent cohesive populations (i.e. gene flow within species is higher than between  
253 species). We performed a quartet-based phylogenetic analysis for each *Nitrospira* species by building  
254 tree quartets of whole-genome orthologous genes (“gene trees”) and core genes (“species trees”) with  
255 four strains of the same species or with two pairs of strains from two different species. In most of the  
256 pairwise species comparisons, the percentage of gene trees supporting the species phylogeny was >  
257 98% (Supplementary Fig. 13). In few cases, this percentage was lower (down to 67% in the  
258 comparison between RSF1 and RSF15\_CG24\_B), but these numbers were always above the within-  
259 species analysis (Supplementary Fig. 13).

260 The *Nitrospira* populations were characterised by strong purifying selection. We used the  
261 relation between non-synonymous and synonymous polymorphisms (pN/pS) to investigate this  
262 evolutionary process. We detected pN/pS < 1, indicating purifying selection, for all *Nitrospira* species  
263 (Fig. 3C). Similar results were observed for other abundant populations inhabiting the waterworks  
264 (Fig. 3C). Purifying selection has frequently been observed in wild populations, and it was the case  
265 for populations inhabiting a grassland meadow<sup>23</sup> (pN/pS = 0.56 ± 0.17, n = 19), but this process seems  
266 to be especially strong in the waterworks populations (pN/pS = 0.34 ± 0.05, n = 24) (Two-Sample t-  
267 test, p < 0.0001) (Fig. 3C), which suggests prior evolution to optimal adaptation to this stable  
268 environment, with purging of non-synonymous mutations.

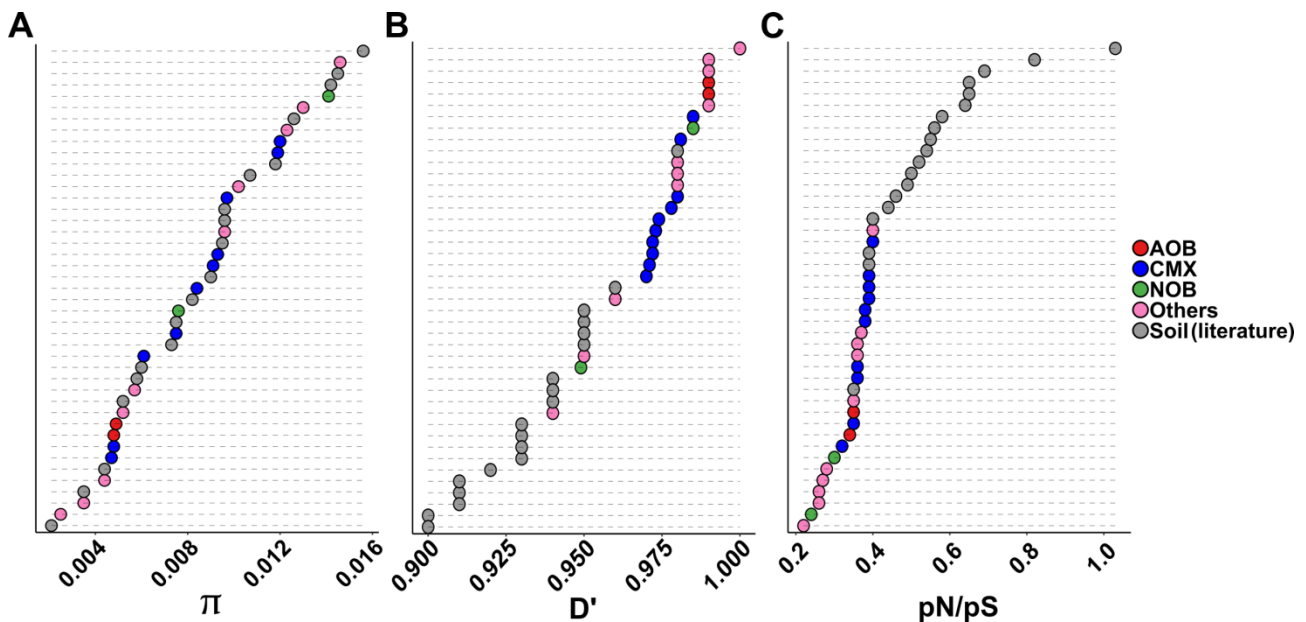

269  
270 **Fig. 3. Evolutionary metrics of *Nitrospira* populations across 12 waterworks.**

271 A Right) Genetic diversity of most abundant bacterial populations across 12 waterworks. A left) It also  
272 includes most abundant bacterial populations across grassland meadow<sup>23</sup>. Microdiversity is measured as  
273 nucleotide diversity ( $\pi$ ). B Right) Homologous recombination ( $D'$ ) of most abundant bacterial populations  
274 across 12 waterworks. B Left) It includes most abundant bacterial populations across grassland meadow. C  
275 left) Selection (pN/pS ratio) of most abundant bacterial populations across 12 waterworks. C right) It includes  
276 most abundant bacterial populations across grassland meadow. Colour legends are displayed on the right of  
277 each figure.

278 Interestingly, the degree of recombination and diversity across different *Nitrospira*  
279 populations varied substantially with habitat (Fig. 4). High variability of recombination in closely  
280 related bacterial species has occasionally been reported<sup>33</sup>, and lifestyle appear as one of the most  
281 relevant factors to explain this variability<sup>14,33</sup>. Our analysis of evolutionary processes in populations  
282 from different habitats (*Nitrospira* from drinking water treatment plants (DWTP), freshwaters and  
283 soils) suggests that the environment also influences ongoing evolutionary processes: different  
284 bacterial types inhabiting the same environment tended to share similar features (Fig. 4), while the  
285 evolutionary characteristics of comammox *Nitrospira* populations differed depending on the  
286 environment where they were retrieved (Fig. 4). Comammox species in the studied waterworks and  
287 in other DWTP were characterised by low recombination, strong purifying selection and moderate  
288 microdiversity (Fig. 4). On the other hand, comammox present in freshwater or, especially, in soils  
289 had higher microdiversity and recombination rate, and weaker purifying selection (Fig. 4).  
290 Intriguingly, we consistently observed that in drinking water treatment systems canonical *Nitrospira*  
291 species showed features similar to those of comammox *Nitrospira* but with even stronger purifying  
292 selection (Fig. 4). This feature, together with the much lower richness observed in canonical  
293 *Nitrospira* compared to comammox bacteria (Fig. 2), suggests that competition can play a more  
294 intense role in canonical *Nitrospira*, which might select for few species optimally adapted to this type  
295 of stable environment. However, a broader analysis is required to confirm this hypothesis.  
296

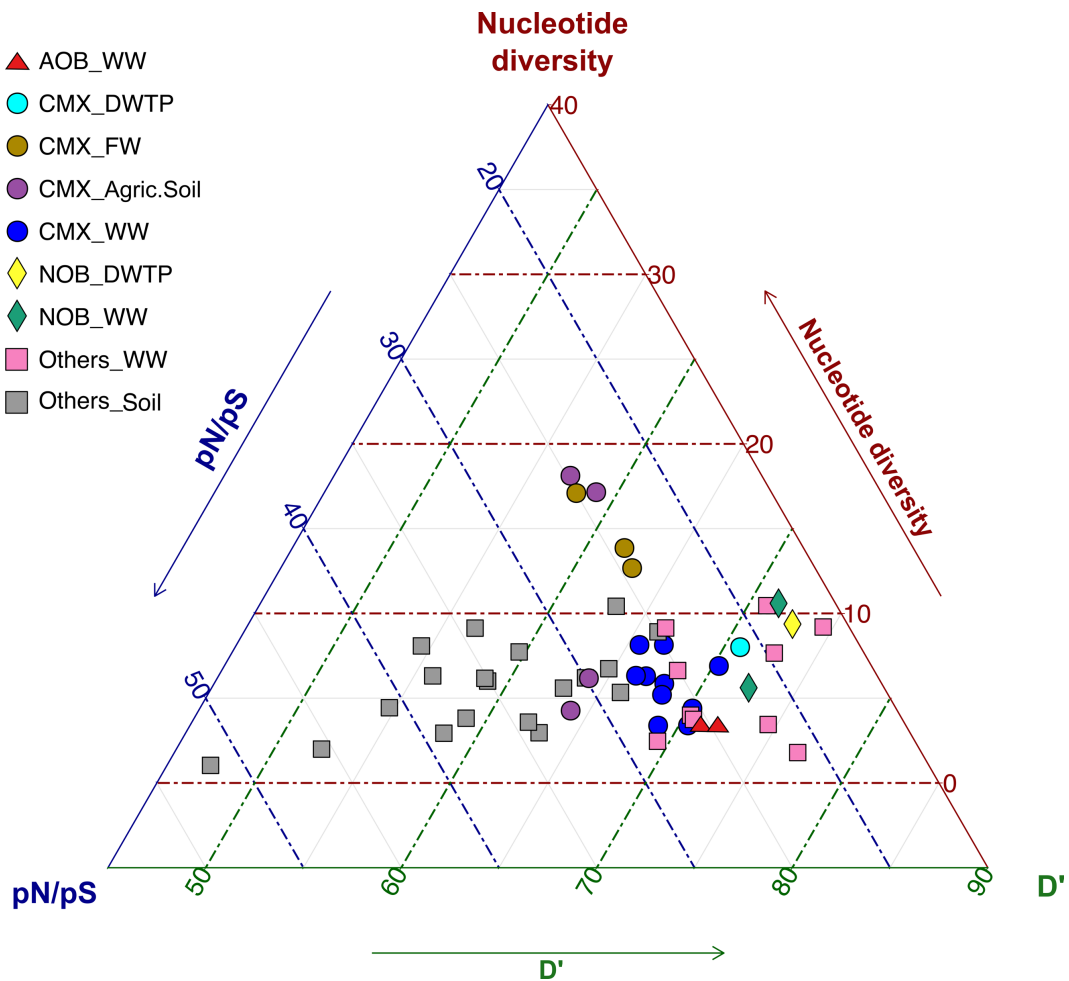

297 **Fig. 4. Impact of environment and microbial type in evolutionary metrics**

298 Triplot composed of the nucleotide diversity, pN/pS ratio and D' values for the bacterial populations of this  
299 study (WW) as well as most abundant bacterial populations across grassland meadow<sup>23</sup> (Soil), and other  
300 *Nitrospira* populations abundant in other systems (Supplementary Table 6; CMX\_FW, CMX\_DWTP,  
301 NOB\_DWTP, and CMX\_Agric.Soil). Colour legends are displayed on the left of the figure.

302

303 **Evolutionary processes at the gene level**

304

305 In addition to a genome-wide analysis, we investigated the evolutionary processes at the gene  
306 level. Genes involved in nitrification (ammonia monooxygenase: *amoA* and *amoB*; hydroxylamine  
307 dehydrogenase: *haoA* and *haoB*; nitrite oxidoreductase: *nxrA* and *nxrB*) in the studied *Nitrospira*  
308 populations generally had a similar nucleotide diversity ( $\pi$ ) (Fig. 5A) and homologous recombination  
309 rate (D') (Fig. 5B) compared to the rest of the genome, but with higher levels of purifying selection  
310 (pN/pS) (Fig. 5C). The nucleotide diversities of genes related to nitrification were very similar with  
311 the exception of *amoB*, which had a significantly lower nucleotide diversity than *nxrB* ( $p < 0.05$ ) (Fig.  
312 5A). A similar pattern was detected for the recombination, but in this case *amoA*, as well as *amoB*,  
313 had significantly lower recombination than *nxrB* ( $p < 0.05$ ) (Fig. 5B). We observed a very strong  
314 purifying selection for most of the nitrifying genes, especially for *amoA*, *nxrA*, and *nxrB* ( $p < 0.01$ )  
315 (Fig. 5C). In the case of *nxrB*, not a single non-synonymous mutation was found in most of the  
316 *Nitrospira* species (0-1 non-synonymous sites vs 17-66 synonymous sites), even though this gene had  
317 a higher nucleotide diversity and homologous recombination (Fig. 5A and Fig. 5B). Our observations  
318 on selection are in line with previous studies, as generally, bacterial essential genes and enzymes  
319 catalysing reactions that are difficult to by-pass through alternative pathways are subject to higher  
320 purifying selection compared to nonessential ones<sup>34-37</sup>.

321 Even though the average pN/pS values were below 1 in all *Nitrospira* species (Fig. 3),  
322 indicating purifying selection, genes with pN/pS values above 1 and significantly higher than the  
323 genomic average were detected in each species (Supplementary Fig. 14). Many of those genes were  
324 related to defence mechanism against phages (e.g. genes putatively involved in phage entry into cells,  
325 ribonucleases, genes coding proteins associated to restriction-modification systems, genes related to  
326 toxin-antitoxin systems, etc (Supplementary Table 7)). Comparable findings were made in other  
327 abundant species from the waterworks (Supplementary Table 8), in the additional *Nitrospira* species  
328 retrieved from other environments (Supplementary Table 8), as well as by Petersen *et al.* (2007) and  
329 by Rabbi *et al.* (2015) in *E. coli* and *Vibrio* sp. strains, respectively<sup>38,39</sup>. These observations suggest  
330 that positive selection in phage-related genes is widespread across bacteria, and highlights the  
331 evolutionary arms race occurring between phages and bacteria as an important driver in bacterial  
332 ecology and evolution<sup>27,40,41</sup>. Additionally, we found nondefense, mobile genetic elements, such as  
333 transposons and integrases, with significantly higher pN/pS values than the genome average in the  
334 *Nitrospira* spp. (Supplementary Table 9).

335

336

337

338

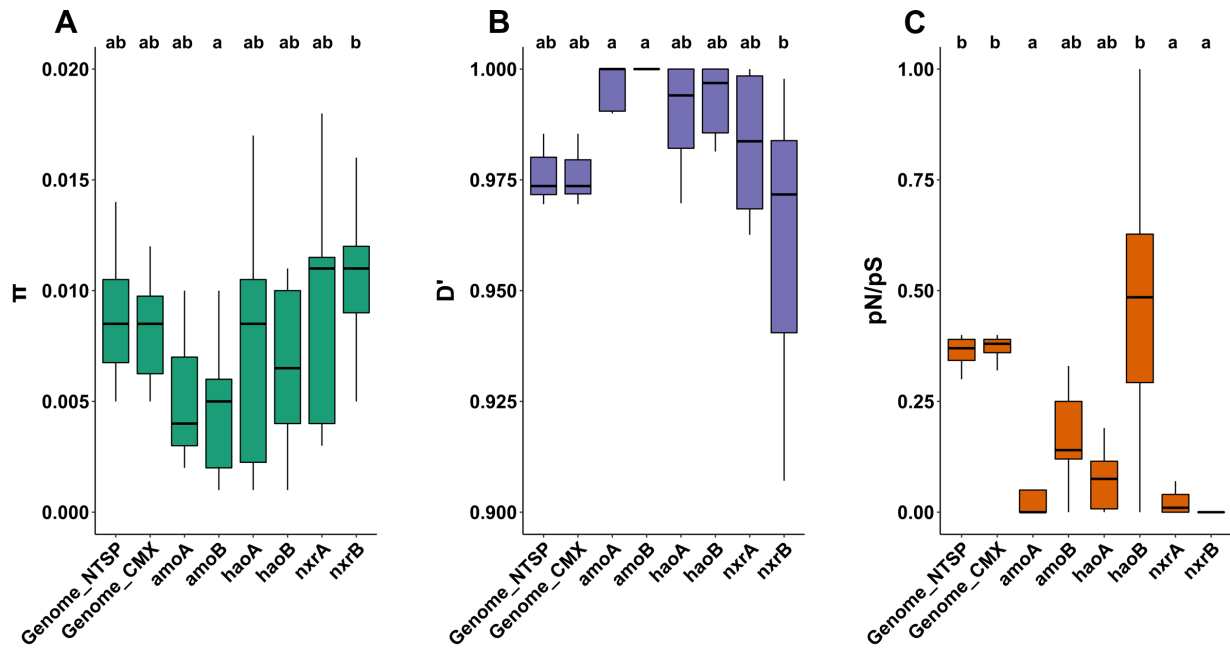

339

340

**Fig. 5. Evolutionary metrics of nitrification genes in *Nitrospira* populations across 12 waterworks.**

341

Left) Boxplot of nucleotide diversity of *Nitrospira* bacterial populations for whole genome (all *Nitrospira* and comammox *Nitrospira*) and nitrification genes. Differences between the mean nucleotide diversities were

342

assessed by a Dunn's test; same letter have means not significantly different from each other ( $p < 0.05$ ).

343

344

Middle) Boxplot of linkage disequilibrium of *Nitrospira* bacterial populations for whole genome (all *Nitrospira* and comammox *Nitrospira*) and nitrification genes. Differences between the mean linkage

345

disequilibriums were assessed by a Dunn's test; same letter have means not significantly different from each other ( $p < 0.05$ ).

346

347

Right) Boxplot of pN/pS ratios of *Nitrospira* bacterial populations for whole genome (all *Nitrospira* and comammox *Nitrospira*) and nitrification genes. Differences between the mean pN/pS ratios

348

were assessed by a Dunn's test; same letter have means not significantly different from each other ( $p < 0.01$ ).

349

350

351

352

## Conclusions

353

354

A major unresolved question is how the relationship between ecology and evolution shapes complex communities in wild environments. Here we use a model microbial system to examine this question.

355

Strain-level analyses enabled us to decipher the degree of intra-population diversity in wild dominant

356

comammox *Nitrospira* inhabiting rapid sand filters and estimate important evolutionary processes

357

such as recombination and selection in these populations. We showed that compared to other

358

environments the *Nitrospira* populations in rapid sand filters are characterized by low recombination

359

and strong purifying selection therefore, we conclude that the evolutionary processes that drive the

360

diversification of *Nitrospira* are dependent on the local environment, as opposed to intrinsic

361

properties of the species.

362

363

364

365

## 366 **Methods**

367

### 368 **Sampling, sequencing, and metagenomic assembled genomes recovery**

369 The sampling description, DNA extraction and sequencing have been previously described<sup>22</sup>. Briefly,  
370 filter material was collected from two locations at the top of the filters of 12 Danish waterworks.  
371 DNA was extracted from 0.5 g of sand material using the MP FastDNA Spin Kit (MP Biomedicals  
372 LLC, Solon, USA). DNA libraries were generated using the 24 extracted DNA with the Nextera XT  
373 DNA library preparation kit (Illumina Inc.) according to the manufacturer's instructions. The samples  
374 were sequenced in one lane, with 2×150 paired read sequencing on the Illumina HiSeq4000 at BGIs  
375 facility in Copenhagen. As previously described<sup>22</sup>, high-quality reads were used for metagenomic  
376 assembled genomes (MAGs) recovery using a combination of automatic and manual binning  
377 followed by filtering and refinement steps to improve the quality of the MAGs. The resulted MAGs  
378 were dereplicated using dRep<sup>42</sup> with the secondary clustering threshold -sa 0.99. Dereplicated MAGs  
379 completeness and contamination was evaluated using CheckM<sup>43</sup>. MAGs with completeness > 50%  
380 and contamination < 10% were kept for downstream analyses.

381

### 382 **Species abundance estimation**

383 A 95% average nucleotide identity (ANI) cut-off was used to define species as proposed by  
384 Klappenbach *et al.* (2007)<sup>16</sup>. The retrieved MAGs were dereplicated using dRep with the secondary  
385 clustering threshold set at 95% gANI. Among the genomes classified as belonging to the same  
386 species, the one with higher quality was chosen as representative genome for that species. The species  
387 abundance and coverage of each representative genome across the studied metagenomes was assessed  
388 using MIDAS<sup>44</sup>. Briefly, MIDAS uses reads mapped to 15 universal single-copy gene families (with  
389 ability to accurately recruit metagenomic reads to the correct species<sup>44</sup>) to estimate the abundance  
390 and coverage of bacterial species from a shotgun metagenome. We used the species retrieved in this  
391 study to build the database of universal-single-copy genes.

392

### 393 **Genome classification and annotation**

394 MAGs were classified (Supplementary Table 10) using the classify workflow of the GTDB-Tk  
395 v.0.1.3 tool<sup>45</sup>. Open reading frames were predicted using Prodigal v. 2.63<sup>46</sup>, and annotated using  
396 blastp<sup>47</sup> against NCBI nr<sup>48</sup>, UniProt<sup>49</sup>, KEGG<sup>50</sup>, PFAM<sup>51</sup> and eggNOG<sup>52</sup>. Genes were assigned to  
397 antiphage defense systems using the strategy described in Doron *et al.* (2018)<sup>53</sup>.

398

### 399 **Phylogenetic analysis**

400 Phylogenetic analyses of *Nitrospira* genomes were conducted with the GTDB-Tk v.0.1.3 tool<sup>45</sup> using  
401 the *de novo* workflow with a set of 120 single copy marker proteins and the genome taxonomy  
402 database (GTDB)<sup>54</sup>. Concatenated alignments were used to construct a maximum likelihood tree  
403 using RAxML v. 8.2.11<sup>55</sup> with 400 rapid bootstraps (determined using the autoMRE option) and the  
404 LG likelihood model of amino acid substitution with gamma distributed rates and fraction of invariant  
405 sites (-m PROTGAMMAILGF; best model determined using ProtTest v. 3.4.2<sup>56</sup>). The tree was rooted  
406 using two *Leptospirillum* species as outgroup. The rooted tree was visualized using the online web  
407 tool from the Interactive Tree of Life (iTol)<sup>57</sup>.

## 408 **Quartet analysis**

409 To retrieve waterworks-specific MAGs for each *Nitrospira* species, the reassembly module of  
410 metaWRAP<sup>58</sup> was used with individual reads from each sample and the representative *Nitrospira*  
411 species MAG. Resulted MAGs were kept for the quartet analysis if the completeness did not vary in  
412 more than 10% compared to the representative *Nitrospira* species MAG and the contamination  
413 remained < 5%. A species phylogenetic tree of the resulting *Nitrospira* MAGs was constructed as  
414 described above. For each quartet analysis we selected four *Nitrospira* MAGs. Four from the same  
415 *Nitrospira* species for within species analysis (the most phylogenetically distant MAGs), and two  
416 from one *Nitrospira* species and two from another one for between species analysis (the most  
417 phylogenetically distant MAGs). Orthofinder v. 2.3.3<sup>59</sup> was used to identify orthologous genes among  
418 each set of four genomes, retaining for subsequent analyses only single-copy orthologous genes.  
419 Orthofinder v. 2.3.3 with the options -M msa -T raxml was also used to produce phylogenetic trees  
420 for each orthologous gene. For each within or between species analysis, topological differences  
421 between each orthologous gene and the species tree were assessed by calculating the Robinson-  
422 Foulds (RF) distance<sup>60</sup> with the R function RF.dist of the phangorn package<sup>61</sup>. This analysis allowed  
423 to obtain, for each quartet, the percentage of single-copy orthologous genes phylogenetic trees which  
424 did not support the species phylogenetic tree topology.

425

## 426 **Read mapping, SNP calling, and population genomic analysis**

427 The population genomic analysis was done following the approach described in Crits-Christoph et al  
428 (2020)<sup>23</sup>. High-quality reads were mapped to an indexed database of the 176 species MAGs recovered  
429 from the waterworks using BWA-MEM<sup>62</sup>. Resulted alignments were filtered using samtools<sup>63</sup> view  
430 -q30 to remove reads with mapping quality less than 30, and also with the script filter\_reads.py<sup>23</sup>  
431 (with the options: -m 96 to retain reads with a percent identity of at least 96% to the reference; and -  
432 q 2 to assure uniquely best mapping read pairs in the index). Downstream analysis was performed for  
433 24 species genomes (all the 12 *Nitrospira* ones, and 12 other abundant species genomes). For each of  
434 these species genomes, we analysed its data in samples that passed a cutoff of at least 50% of the  
435 genome being covered with at least 5× coverage. 149 out of 576 sample genome comparisons (24  
436 genomes × 24 samples) passed this minimum requirement. Sample read mappings were pooled by  
437 each waterworks and by all samples across the waterworks. Nucleotide diversity ( $\pi$ ), linkage  
438 disequilibrium ( $D'$ ) and pN/pS ratio were calculated for each sample, each waterworks and across all  
439 the waterworks as described elsewhere<sup>23</sup> using the provided scripts.  $F_{ST}$  was calculated following the  
440 same procedure but on sites segregating across two waterworks being compared (for all the possible  
441 waterworks comparisons). As Crits-Christoph *et al.* (2020)<sup>23</sup> recommended, only sites with a  
442 coverage of at least 20× in each waterworks was used to calculate  $F_{ST}$ . In addition, genes with  
443 coverages in a waterworks outside of the range of two standard deviations were excluded from the  
444 analysis. As previously suggested<sup>23</sup>, a two-sample Wilcoxon test was conducted to find out if average  
445 linkage of highly differentiated loci differed from the genomic average for each species. Similarly, a  
446 two-sample *t*-tests was used to conclude if average nucleotide diversity of highly differentiated loci  
447 differed from the genomic average. Both sets of tests were corrected for multiple hypotheses using  
448 the Benjamini–Hochberg method.

449 Same strain-level analysis as the one described above was conducted in *Nitrospira* MAGs previously  
450 recovered<sup>22</sup> that passed a cutoff of at least 50% of the genome being covered with at least 5× coverage  
451 in any of the metagenomes were *Nitrospira* MAGs were found to be present<sup>22</sup>.

452

### 453 **Statistical Analyses.**

454 All statistical tests were performed using R v3.5.2<sup>64</sup>. For all statistical analyses, species abundances  
455 data was treated as followed: zeros were replaced with an estimate value using the Count Zero  
456 Multiplicative approach with the zCompositions R package<sup>65</sup>, and data were further centred log-ratio  
457 transformed. *Nitrospira* community dissimilarities were calculated using the Jaccard index. The  
458 correlation between the *Nitrospira* community dissimilarities and geographic distances was  
459 calculated using the Mantel test (significance obtained after 100,000 permutations). Same analysis  
460 was used to assess the correlation between the *Nitrospira* community dissimilarities and the water  
461 composition dissimilarity, as well as the correlation between major allele dissimilarities and  
462 geographic distances.

463 Proportionality between abundances of the species across the 24 metagenomes were calculated using  
464 the propr R package<sup>66</sup> (with the options metric = "rho", ivar = "clr") and visualised using the corrplot  
465 R package<sup>67</sup>. For the network analysis, the function getNetwork from propr R package was used to  
466 retain proportionalities > 0.56 (FDR < 5%). The network was visualised using the igraph R package<sup>68</sup>.  
467 Same approach was used to build the network including phages but, in this case, proportionalities >  
468 0.51 (FDR < 5%) were retained.

469 Redundancy analysis (RDA) was performed in R package vegan<sup>69</sup>. RDA was conducted using centred  
470 log-ratio transformed *Nitrospira* species abundances and chemical data of influent water. The  
471 constrained ordination model and the variable significance were determined by permutation tests  
472 (1000 permutations) with anova.cca in vegan. Principal components analysis (PCA) was performed  
473 in R package factoextra<sup>70</sup> using the nucleotide diversity, pN/pS ratio and D' values for the bacterial  
474 populations retrieved from the waterworks, as well as most abundant bacterial populations across  
475 grassland meadow<sup>23</sup>, and other *Nitrospira* populations abundant in other systems.

476 Differences between the mean nucleotide diversities of the nitrifying genes, whole *Nitrospira*  
477 genomes, and whole comammox *Nitrospira* genomes were assessed using Kruskal–Wallis ANOVA  
478 followed by Dunn's test with the Holm–Bonferroni correction. Same analysis was performed for  
479 linkage disequilibrium and pN/pS ratios.

480

### 481 **Recovery of draft phage genomes and abundance estimation**

482 MARVEL<sup>71</sup> was used to recover draft phage genomes from the co-assembly generated from the  
483 waterworks (describe above). As recommended by MARVEL, Metabat<sup>72</sup> was run using the  
484 parameters -m 1500 -s 10000 to produce bins with contigs of at least 1500 bp and with a minimum  
485 total size of 10 kbp. Then, we executed MARVEL to identify phage bins from the 1026 bins generated  
486 with Metabat. The abundance in each sample of the 43 identified draft phage genomes was estimated  
487 using the quant module from metaWRAP<sup>73</sup> (Supplementary Table 11).

488

489

490

491 **Chemical analysis of influent water**

492 Ammonium was measured using a standard colorimetric salicylate and hypochlorite method<sup>74</sup>. Iron  
493 and manganese content was determined by ICP-MS (7700x, Agilent Technologies). NVOC analysis  
494 was performed using a wet chemical TOC-analyser TOC-V WP (Shimadzu, Kyoto, Japan).

495

496

497 **Data availability**

498 All raw sequence data and *Nitrospira* genomes retrieved from the Danish rapid sand filters have been  
499 deposited at NCBI under the project PRJNA384587. The rest of the retrieved draft genomes from the  
500 Danish rapid sand filters are available on figshare (<https://doi.org/10.6084/m9.figshare.12962075>).

501

502 **Acknowledgements**

503 We thank Gabriel E. Leventhal for helpful discussions on data analysis and theory. This research was  
504 supported by a research grant (13391, Expa-N) from VILLUM FONDEN.

505

506 **Authors contributions**

507 A.P conceived the study and performed the bioinformatic analyses. A.P, O.X.C and A.D led  
508 interpretation of the results supported by B.F.S. A.P drafted the manuscript with input from A.D,  
509 O.X.C and B.F.S. All authors contributed to manuscript revision, and approved the final version of  
510 the manuscript.

511

512

513 **References**

514

- 515 1. Hairston, N. G., Ellner, S. P., Geber, M. A., Yoshida, T. & Fox, J. A. Rapid evolution and  
516 the convergence of ecological and evolutionary time. *Ecol. Lett.* **8**, 1114–1127 (2005).
- 517 2. Barroso-Batista, J. *et al.* The First Steps of Adaptation of *Escherichia coli* to the Gut Are  
518 Dominated by Soft Sweeps. *PLoS Genet.* **10**, e1004182 (2014).
- 519 3. Lawrence, D. *et al.* Species Interactions Alter Evolutionary Responses to a Novel  
520 Environment. *PLoS Biol.* **10**, e1001330 (2012).
- 521 4. Deneff, V. J., Mueller, R. S. & Banfield, J. F. AMD biofilms: using model communities to  
522 study microbial evolution and ecological complexity in nature. *ISME J.* **4**, 599–610 (2010).
- 523 5. Palomo, A. *et al.* Metagenomic analysis of rapid gravity sand filter microbial communities  
524 suggests novel physiology of *Nitrospira* spp. *ISME J.* **10**, 2569–2581 (2016).
- 525 6. Gülay, A. *et al.* DNA- and RNA-SIP Reveal *Nitrospira* spp. as Key Drivers of Nitrification  
526 in Groundwater-Fed Biofilters. *MBio* **10**, (2019).
- 527 7. Hu, W. *et al.* Metagenomics Unravels Differential Microbiome Composition and Metabolic  
528 Potential in Rapid Sand Filters Purifying Surface Water Versus Groundwater. *Environ. Sci.*  
529 *Technol.* **54**, 5197–5206 (2020).
- 530 8. Tatari, K. *et al.* Density and distribution of nitrifying guilds in rapid sand filters for drinking  
531 water production: Dominance of *Nitrospira* spp. *Water Res.* **127**, 239–248 (2017).
- 532 9. Fowler, S. J., Palomo, A., Dechesne, A., Mines, P. D. & Smets, B. F. Comammox *Nitrospira*  
533 are abundant ammonia oxidizers in diverse groundwater-fed rapid sand filter communities.



- 534 *Environ. Microbiol.* **20**, 1002–1015 (2018).
- 535 10. Koch, H., Kessel, M. A. H. J. van & Lückner, S. Complete nitrification: insights into the  
536 ecophysiology of comammox Nitrospira. *Appl. Microbiol. Biotechnol.* 1–13 (2018).  
537 doi:10.1007/s00253-018-9486-3
- 538 11. Palomo, A. *et al.* Comparative genomics sheds light on niche differentiation and the  
539 evolutionary history of comammox Nitrospira. *ISME J.* **12**, 1779–1793 (2018).
- 540 12. Dutta, C. & Paul, S. Microbial Lifestyle and Genome Signatures. *Curr. Genomics* **13**, 153–  
541 162 (2012).
- 542 13. Scheuerl, T. *et al.* Bacterial adaptation is constrained in complex communities. *Nat.*  
543 *Commun.* **11**, 754 (2020).
- 544 14. González-Torres, P., Rodríguez-Mateos, F., Antón, J. & Gabaldón, T. Impact of Homologous  
545 Recombination on the Evolution of Prokaryotic Core Genomes. *MBio* **10**, (2019).
- 546 15. Martinez, J. L. The role of natural environments in the evolution of resistance traits in  
547 pathogenic bacteria. *Proc. R. Soc. B Biol. Sci.* **276**, 2521–2530 (2009).
- 548 16. Klappenbach, J. A. *et al.* DNA–DNA hybridization values and their relationship to whole-  
549 genome sequence similarities. *Int. J. Syst. Evol. Microbiol.* **57**, 81–91 (2007).
- 550 17. Jain, C., Rodriguez-R, L. M., Phillippy, A. M., Konstantinidis, K. T. & Aluru, S. High  
551 throughput ANI analysis of 90K prokaryotic genomes reveals clear species boundaries. *Nat.*  
552 *Commun.* **9**, 5114 (2018).
- 553 18. Olm, M. R. *et al.* Consistent Metagenome-Derived Metrics Verify and Delineate Bacterial  
554 Species Boundaries. *mSystems* **5**, (2020).
- 555 19. Louca, S. *et al.* Function and functional redundancy in microbial systems. *Nat. Ecol. Evol.*  
556 (2018). doi:10.1038/s41559-018-0519-1
- 557 20. Gülay, A. *et al.* Internal porosity of mineral coating supports microbial activity in rapid sand  
558 filters for groundwater treatment. *Appl. Environ. Microbiol.* **80**, 7010–7020 (2014).
- 559 21. Costa, E., Pérez, J. & Kreft, J.-U. Why is metabolic labour divided in nitrification? *Trends*  
560 *Microbiol.* **14**, 213–219 (2006).
- 561 22. Palomo, A., Dechesne, A. & Smets, B. F. Genomic profiling of Nitrospira species reveals  
562 ecological success of comammox Nitrospira. *bioRxiv* (2019). doi:10.1101/612226
- 563 23. Crits-Christoph, A., Olm, M. R., Diamond, S., Bouma-Gregson, K. & Banfield, J. F. Soil  
564 bacterial populations are shaped by recombination and gene-specific selection across a  
565 grassland meadow. *ISME J.* 1–25 (2020). doi:10.1038/s41396-020-0655-x
- 566 24. Shapiro, B. J. *et al.* Population Genomics of Early Events in the Ecological Differentiation of  
567 Bacteria. *Science (80-. )*. **336**, 48–51 (2012).
- 568 25. Rosen, M. J., Davison, M., Bhaya, D. & Fisher, D. S. Fine-scale diversity and extensive  
569 recombination in a quasisexual bacterial population occupying a broad niche. *Science (80-. )*.  
570 **348**, 1019–1023 (2015).
- 571 26. Bendall, M. L. *et al.* Genome-wide selective sweeps and gene-specific sweeps in natural  
572 bacterial populations. *Isme J* **10**, 1589–1601 (2016).
- 573 27. Shapiro, B. J., Leducq, J.-B. & Mallet, J. What Is Speciation? *PLOS Genet.* **12**, e1005860  
574 (2016).
- 575 28. VanLiere, J. M. & Rosenberg, N. A. Mathematical properties of the measure of linkage  
576 disequilibrium. *Theor. Popul. Biol.* **74**, 130–137 (2008).
- 577 29. Lin, M. & Kussell, E. Inferring bacterial recombination rates from large-scale sequencing  
578 datasets. *Nat. Methods* **16**, 199–204 (2019).
- 579 30. Doroghazi, J. R. & Buckley, D. H. Widespread homologous recombination within and  
580 between *Streptomyces* species. *ISME J.* **4**, 1136–1143 (2010).
- 581 31. Carja, O., Liberman, U. & Feldman, M. W. Evolution in changing environments: Modifiers

- 582 of mutation, recombination, and migration. *Proc. Natl. Acad. Sci.* **111**, 17935–17940 (2014).
- 583 32. Hanage, W. P. Not So Simple After All: Bacteria, Their Population Genetics, and  
584 Recombination. *Cold Spring Harb. Perspect. Biol.* **8**, a018069 (2016).
- 585 33. Didelot, X. & Maiden, M. C. J. Impact of recombination on bacterial evolution. *Trends*  
586 *Microbiol.* **18**, 315–322 (2010).
- 587 34. Luo, H., Gao, F. & Lin, Y. Evolutionary conservation analysis between the essential and  
588 nonessential genes in bacterial genomes. *Sci. Rep.* **5**, 13210 (2015).
- 589 35. Dilucca, M., Cimini, G. & Giansanti, A. Essentiality, conservation, evolutionary pressure and  
590 codon bias in bacterial genomes. *Gene* **663**, 178–188 (2018).
- 591 36. Aguilar-Rodríguez, J. & Wagner, A. Metabolic Determinants of Enzyme Evolution in a  
592 Genome-Scale Bacterial Metabolic Network. *Genome Biol. Evol.* **10**, 3076–3088 (2018).
- 593 37. Zhong, C. *et al.* Pan-genome analyses of 24 *Shewanella* strains re-emphasize the  
594 diversification of their functions yet evolutionary dynamics of metal-reducing pathway.  
595 *Biotechnol. Biofuels* **11**, 193 (2018).
- 596 38. Petersen, L., Bollback, J. P., Dimmic, M., Hubisz, M. & Nielsen, R. Genes under positive  
597 selection in *Escherichia coli*. *Genome Res.* **17**, 1336–1343 (2007).
- 598 39. Rabby, A. *et al.* Identification of the positively selected genes governing host-pathogen arm  
599 race in *Vibrio* sp. through comparative genomics approach. *Biojournal Sci. Technol.* **2**,  
600 (2015).
- 601 40. Rodriguez-Valera, F. *et al.* Explaining microbial population genomics through phage  
602 predation. *Nat. Rev. Microbiol.* **7**, 828–836 (2009).
- 603 41. Cordero, O. X. & Polz, M. F. Explaining microbial genomic diversity in light of evolutionary  
604 ecology. *Nat. Rev. Microbiol.* **12**, 263–273 (2014).
- 605 42. Olm, M. R., Brown, C. T., Brooks, B. & Banfield, J. F. DRep: A tool for fast and accurate  
606 genomic comparisons that enables improved genome recovery from metagenomes through  
607 de-replication. *ISME J.* **11**, 2864–2868 (2017).
- 608 43. Parks, D. H., Imelfort, M., Skennerton, C. T., Hugenholtz, P. & Tyson, G. W. CheckM:  
609 assessing the quality of microbial genomes recovered from isolates, single cells, and  
610 metagenomes. *Genome Res.* **25**, 1043–55 (2015).
- 611 44. Nayfach, S., Rodriguez-Mueller, B., Garud, N. & Pollard, K. S. An integrated metagenomics  
612 pipeline for strain profiling reveals novel patterns of bacterial transmission and  
613 biogeography. *Genome Res.* **26**, 1612–1625 (2016).
- 614 45. Chaumeil, P.-A., Mussig, A. J., Hugenholtz, P. & Parks, D. H. GTDB-Tk: a toolkit to  
615 classify genomes with the Genome Taxonomy Database. *Bioinformatics* (2019).  
616 doi:10.1093/bioinformatics/btz848
- 617 46. Hyatt, D. *et al.* Prodigal: prokaryotic gene recognition and translation initiation site  
618 identification. *BMC Bioinformatics* **11**, 119 (2010).
- 619 47. Altschul, S. F., Gish, W., Miller, W., Myers, E. W. & Lipman, D. J. Basic local alignment  
620 search tool. *J. Mol. Biol.* **215**, 403–410 (1990).
- 621 48. Sayers, E. W. *et al.* GenBank. *Nucleic Acids Res.* **47**, D94–D99 (2019).
- 622 49. UniProt: a worldwide hub of protein knowledge. *Nucleic Acids Res.* **47**, D506–D515 (2019).
- 623 50. Ogata, H. *et al.* KEGG: Kyoto encyclopedia of genes and genomes. *Nucleic Acids Res.* **27**,  
624 29–34 (1999).
- 625 51. Punta, M. *et al.* The Pfam protein families database. *Nucleic Acids Res.* **40**, D290–D301  
626 (2012).
- 627 52. Huerta-Cepas, J. *et al.* eggNOG 4.5: a hierarchical orthology framework with improved  
628 functional annotations for eukaryotic, prokaryotic and viral sequences. *Nucleic Acids Res.* **44**,  
629 D286–D293 (2016).

- 630 53. Doron, S. *et al.* Systematic discovery of antiphage defense systems in the microbial  
631 pangenome. *Science* (80-. ). **359**, eaar4120 (2018).
- 632 54. Parks, D. H. *et al.* A standardized bacterial taxonomy based on genome phylogeny  
633 substantially revises the tree of life. *Nat. Biotechnol.* (2018). doi:10.1038/nbt.4229
- 634 55. Stamatakis, A. RAxML version 8: a tool for phylogenetic analysis and post-analysis of large  
635 phylogenies. *Bioinformatics* **30**, 1312–1313 (2014).
- 636 56. Darriba, D., Taboada, G. L., Doallo, R. & Posada, D. ProtTest 3: fast selection of best-fit  
637 models of protein evolution. *Bioinformatics* **27**, 1164–1165 (2011).
- 638 57. Letunic, I. & Bork, P. Interactive tree of life (iTOL) v3: an online tool for the display and  
639 annotation of phylogenetic and other trees. *Nucleic Acids Res.* **44**, W242–W245 (2016).
- 640 58. Uritskiy, G. V., DiRuggiero, J. & Taylor, J. MetaWRAP—a flexible pipeline for genome-  
641 resolved metagenomic data analysis. *Microbiome* **6**, 158 (2018).
- 642 59. Emms, D. M. & Kelly, S. OrthoFinder: phylogenetic orthology inference for comparative  
643 genomics. *Genome Biol.* **20**, 238 (2019).
- 644 60. Robinson, D. F. & Foulds, L. R. Comparison of phylogenetic trees. *Math. Biosci.* **53**, 131–  
645 147 (1981).
- 646 61. Schliep, K. P. phangorn: phylogenetic analysis in R. *Bioinformatics* **27**, 592–593 (2011).
- 647 62. Li, H. & Durbin, R. Fast and accurate long-read alignment with Burrows-Wheeler transform.  
648 *Bioinformatics* **26**, 589–95 (2010).
- 649 63. Li, H. *et al.* The Sequence Alignment/Map format and SAMtools. *Bioinformatics* **25**, 2078–  
650 2079 (2009).
- 651 64. Team, R. C. R: A language and environment for statistical computing. (2014).
- 652 65. Palarea-Albaladejo, J. & Martín-Fernández, J. A. zCompositions — R package for  
653 multivariate imputation of left-censored data under a compositional approach. *Chemom.*  
654 *Intell. Lab. Syst.* **143**, 85–96 (2015).
- 655 66. Quinn, T. P., Richardson, M. F., Lovell, D. & Crowley, T. M. propr: An R-package for  
656 Identifying Proportionally Abundant Features Using Compositional Data Analysis. *Sci. Rep.*  
657 **7**, 16252 (2017).
- 658 67. Wei, T. & Simko, V. R Package ‘corrplot’: visualization of a correlation matrix. (2017).
- 659 68. Gabor, C. & Tamas, N. The igraph software package for complex network research.  
660 *InterJournal Complex Sy*, 1695 (2006).
- 661 69. Oksanen, J. *et al.* Package ‘vegan’ Title Community Ecology Package. *Community Ecol.*  
662 *Packag.* **2**, 1–297 (2019).
- 663 70. Kassambara, A. & Mundt, F. factoextra: Extract and Visualize the Results of Multivariate  
664 Data Analyses. <https://CRAN.R-project.org/package=factoextra> (2017).
- 665 71. Amgarten, D., Braga, L. P. P., da Silva, A. M. & Setubal, J. C. MARVEL, a Tool for  
666 Prediction of Bacteriophage Sequences in Metagenomic Bins. *Front. Genet.* **9**, (2018).
- 667 72. Kang, D. D., Froula, J., Egan, R. & Wang, Z. MetaBAT, an efficient tool for accurately  
668 reconstructing single genomes from complex microbial communities. *PeerJ* **3**, e1165 (2015).
- 669 73. Uritskiy, G. V., DiRuggiero, J. & Taylor, J. MetaWRAP—a flexible pipeline for genome-  
670 resolved metagenomic data analysis. *Microbiome* **6**, 158 (2018).
- 671 74. Bower, C. E. & Holm-Hansen, T. A Salicylate–Hypochlorite Method for Determining  
672 Ammonia in Seawater. *Can. J. Fish. Aquat. Sci.* **37**, 794–798 (1980).
- 673
- 674
